# Supplementary material
Source: PubMed Central journal article supplement (PMC2936644)
Supplement: 1006068107_pnas.201006068SI.pdf [file 1006068107_pnas.201006068SI.pdf]

# Supporting Information

Kéri et al. 10.1073/pnas.1006068107

**Table S1. Neuropsychological characterization of the participants**

|                                             | SNCA duplication ( <i>n</i> = 7) | Controls ( <i>n</i> = 10) | <i>P</i> value ( <i>t</i> test) |
|---------------------------------------------|----------------------------------|---------------------------|---------------------------------|
| WCST categories                             | 5.9 (0.4)                        | 5.7 (0.5)                 | 0.5                             |
| WCST number of perseverative errors         | 7.4 (2.4)                        | 7.5 (2.1)                 | 0.9                             |
| Trail Making A                              | 34.3 (12.7)                      | 36.5 (13.8)               | 0.7                             |
| Trail Making B                              | 65.4 (14.9)                      | 63.1 (13.0)               | 0.7                             |
| Rey Auditory Verbal Learning (trials 1–5)   | 48.6 (6.4)                       | 48.4 (6.1)                | 0.9                             |
| Rey–Osterrieth Complex Figure—copy          | 32.6 (3.4)                       | 32.9 (3.7)                | 0.9                             |
| Rey–Osterrieth Complex Figure—recall (30 s) | 20.6 (3.6)                       | 20.2 (3.1)                | 0.8                             |

Data are mean (SD). Assessment included concept formation and reasoning [Wisconsin Card Sorting Test (WCST)], attention and processing speed (Trail Making), verbal memory (Rey Auditory Verbal Learning Test), visual memory (Rey–Osterrieth Complex Figure—recall), and visuospatial organization (Rey–Osterrieth Complex Figure—copy) (1).

1. Strauss E, Sherman EMS, Spreen O (2006) *A Compendium of Neuropsychological Tests. Administration, Norms, and Commentary* (Oxford University Press, Oxford), 3rd Ed.
